# Supplementary material for: Factors Associated with Dog Rabies Immunization in Changsha, China: Results of a Cross-Sectional Cluster Survey, 2015–2021
Source: MDPI journal article supplement (doi:10.3390/v15010138), 2022-12-31
Supplement: s1 [file s1]

**Table S1.** Qualified rate of vaccine antibody in each urban area, Changsha, China, 2015-2021.

|                | 2015      | 2016      | 2017      | 2018      | 2019      | 2020      | 2021      |
|----------------|-----------|-----------|-----------|-----------|-----------|-----------|-----------|
| <b>Kaifu</b>   | 34.55%    | 44.19%    | 70.73%    | 82.95%    | 56.80%    | 67.88%    | 84.38%    |
|                | (19/55)   | (19/43)   | (87/123)  | (107/129) | (71/125)  | (112/165) | (81/96)   |
| <b>Furong</b>  | 28.74%    | 66.67%    | 77.53%    | 82.72%    | 70.00%    | 76.50%    | 92.83%    |
|                | (25/87)   | (34/51)   | (138/178) | (134/162) | (63/90)   | (153/200) | (246/265) |
| <b>Tianxin</b> | 52.50%    | 47.37%    | 63.53%    | 46.32%    | 80.77%    | 71.67%    | 86.23%    |
|                | (21/40)   | (18/38)   | (54/85)   | (44/95)   | (42/52)   | (86/120)  | (119/138) |
| <b>Yuhua</b>   | 62.86%    | 56.82%    | 77.87%    | 84.38%    | 78.21%    | 82.50%    | 94.19%    |
|                | (66/105)  | (75/132)  | (190/244) | (135/160) | (122/156) | (198/240) | (292/310) |
| <b>Yuelu</b>   | 48.98%    | 51.14%    | 66.67%    | 52.87%    | 74.77%    | 70.24%    | 89.73%    |
|                | (24/49)   | (45/88)   | (66/99)   | (92/174)  | (80/107)  | (118/168) | (131/146) |
| <b>Total</b>   | 46.13%    | 54.26%    | 73.38%    | 71.11%    | 71.32%    | 74.69%    | 90.99%    |
|                | (155/336) | (191/352) | (535/729) | (512/720) | (378/530) | (667/893) | (869/955) |
